# Supplementary material
Source: PubMed Central journal article supplement (PMC5840489)

**A**

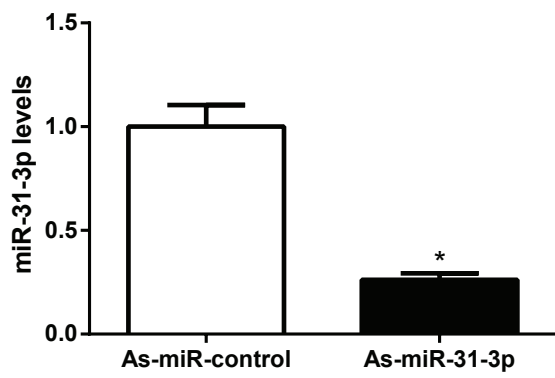

**B**

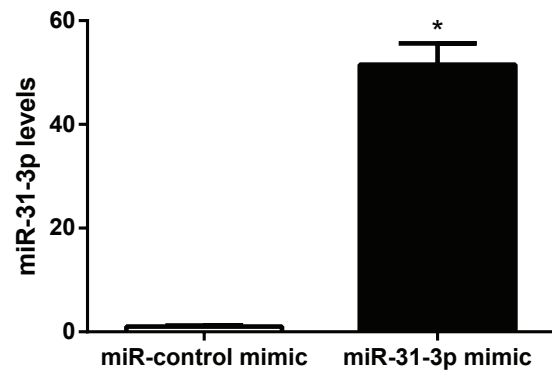

Supplementary Figure 1.

Supplement: mmc1.pdf [file mmc1.pdf]

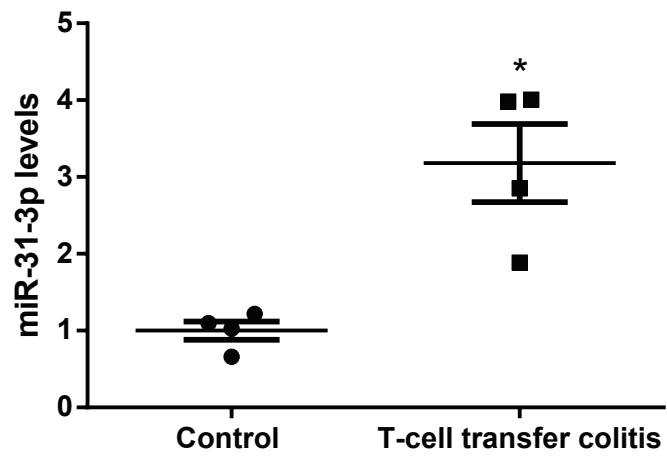

Supplementary Figure 2.

Supplement: mmc2.pdf [file mmc2.pdf]

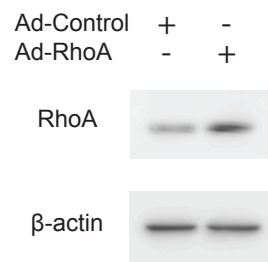

Supplementary Figure 5.

Supplement: mmc5.pdf [file mmc5.pdf]
